Psychological factors associated with instrumental activities of daily living disability in older adults with knee osteoarthritis

# Authors:

Keigo Nanjo, P.T., M.S.<sup>a, b, \*</sup>, (E-mail: nanjo.reh@tmd.ac.jp).

Takashi Ikeda, P.T., Ph.D.<sup>a, c, d</sup>, (E-mail: tk.ikeda@nr.showa-u.ac.jp).

Naoko Nagashio, P.T., B.S.<sup>b</sup>, (E-mail: naokoko5555@gmail.com).

Tomoko Sakai, M.D., Ph.D.<sup>a</sup>, (E-mail: t\_sakai.orth@tmd.ac.jp).

Tetsuya Jinno, M.D., Ph.D.<sup>e</sup>, (E-mail: jinnot@dokkyomed.ac.jp).

# Affiliations

<sup>a</sup> Department of Rehabilitation Medicine, Tokyo Medical and Dental University

Graduate School, 1-5-45 Yushima, Bunkyo-ku, Tokyo, Japan

<sup>b</sup> Department of Rehabilitation, Shonan Kamakura General Hospital, 1370-1 Okamoto,

Kamakura, Kanagawa, Japan

<sup>c</sup> School of Nursing and Rehabilitation Sciences, Showa University, 1865

Tokaichibacho, Midori-ku, Yokohama, Kanagawa, Japan

<sup>d</sup> Research Institute for Sport and Exercise Sciences, Showa University, 2-1-1

Fujigaoka, Aoba-ku, Yokohama, Kanagawa, Japan

<sup>e</sup> Department of Orthopaedic Surgery, Dokkyo Medical University Saitama Medical

Center, 2-1-50 Minami-Koshigaya, Koshigaya, Saitama, Japan

NOTE: This preprint reports new research that has not been certified by peer review and should not be used to guide clinical practice.

1    **\*Corresponding author:**

2    Keigo Nanjo, P.T., M.S.

3    Tokyo Medical and Dental University Graduate School, Department of Rehabilitation

4    Medicine

5    1-5-24, Yusima, Bunkyo-ku, Tokyo 113-8510, Japan

6    E-mail: nanjo.reh@tmd.ac.jp

7    Tel: +81-03-5803-5648

# 1    **Abstract**

2    **Background:** The population of older adults with knee osteoarthritis (OA)-related  
3    disabilities is increasing globally. Instrumental activities of daily living (IADL) are  
4    crucial elements in the daily lives of older adults; however, psychological factors  
5    associated with IADL disability in older adults with knee OA are unclear.

6    **Objective:** We aim to investigate the psychological factors associated with IADL  
7    disability in older adults with knee OA.

8    **Materials and Methods:** A cross-sectional study was conducted on 179 patients with  
9    knee OA aged  $\geq 65$  years. Six-item short form of the pain catastrophizing scale (PCS-  
10    6), four-item short form of the pain self-efficacy questionnaire (PSEQ-4), and the  
11    fifteen-item geriatric depression scale (GDS-15) were used to assess the psychological  
12    factors. IADL status was assessed using eight activity items. Participants were divided  
13    into IADL disabled and non-disabled groups. Binary logistic regression analyses were  
14    performed with the dependent variable as IADL disabled or non-disabled. PCS-6,  
15    PSEQ-4, and GDS-15 were included as independent variables in the logistic regression

model. Age, sex, gait speed, knee muscle strength, and pain intensity were also included as confounders.

**Results:** Of the participants, 88 (49.1%) showed disability in conducting IADL. PSEQ-4 (odds ratio =0.90, 95%; confidence interval=0.82–0.99,  $p=0.02$ ) was a significant independent variable among all psychological factors.

**Conclusion:** Our study showed the importance of assessing self-efficacy using PSEQ-4 as the factor associated with the presence of IADL disability in older adults with knee OA.

**Keywords:** gait speed, instrumental activities of daily living, knee osteoarthritis, older adult, pain, self-efficacy

## 1. Introduction

Knee osteoarthritis (OA) is a prevalent age-related chronic condition, and one of the common causes of disabilities limiting daily activities in older adults (Bijlsma et al., 2011). Since the population of older adults with knee OA-related disabilities is increasing globally (Global Burden of Disease Study, 2015), healthcare professionals need effective countermeasures to address this concern.

Instrumental activities of daily living (IADL) are essential elements in the independent lives of older adults. It is defined as independent functioning in a given environment and includes activities such as meal preparation, shopping, commutation, financial management, and performance of other household chores (Lawton & Brody, 1969). Basic activities of daily living (BADL) include basic self-care activities such as bathing, dressing, eating, and other indoor activities (Katz et al., 1963); IADL require more complex functioning than BADL. Since IADL disability in older adults influences health-related quality of life (Fried et al., 1998), all-cause mortality (Scott et al., 1997),

and decline of cognitive function (Rajan et al., 2013), assessments and interventions for IADL disability are important for older adults.

Disabilities in patients with knee OA are affected by several factors such as gait speed, knee muscle strength, and pain (Pereira et al., 2011; van Dijk et al., 2009). Psychological factors such as pain catastrophizing (Odole et al., 2019; Sinikallio et al., 2014; Somers et al., 2009), self-efficacy (Creamer et al., 2000; Maly et al., 2006; Rejeski et al., 2001; Sinikallio et al., 2014) and depressive symptoms (Creamer et al., 2000; Maly et al., 2006; Zambon et al., 2016) have also been reported among disabled patients with knee OA. Regarding psychological interventions for patients with knee OA, a systematic review proved effective in improving functional limitation (Dixon et al., 2013). A randomized controlled trial showed that a combined intervention of exercise and cognitive therapy for pain was more effective in dealing with the disability than exercise or cognitive therapy each alone (Bennell et al., 2016).

In most studies on psychological factors and disability among patients with knee OA (Creamer et al., 2000; Maly et al., 2006; Odole et al., 2019; Rejeski et al., 2001; Sinikallio et al., 2014; Somers et al., 2009; Zambon et al., 2016), disability has

been treated as a concept that combines BADL and IADL. It is well known that disabilities in older adults progress hierarchically (Barberger-Gateau et al., 2000), IADL disability occurs before BADL disability (Edjolo et al., 2016). To prevent an incident or deterioration of disabilities in older adults with knee OA, countermeasures should be taken at an early stage of the disability. Therefore, specific factors related to IADL disability must be identified to develop effective interventions for treating it. To our knowledge, there are few studies on IADL disability in older adults with knee OA (Dunlop et al., 2005; George et al., 2008); only our previous study has specified that gait speed and pain intensity are factors related to IADL disability in older adults with knee OA (Nanjo et al., 2021). Psychological interventions are recommended for such disabilities (Dixon et al., 2013); however, which psychological factors specifically are associated with IADL disability are unclear.

This study aimed to investigate which psychological factors are associated with IADL disability in older adults with knee OA. We hypothesized that psychological factors such as pain catastrophizing, self-efficacy, and depressive symptoms are

independently associated with IADL disability, even when adjusted for demographics, motor functions, and pain intensity as confounders.

## **2. Materials and Methods**

### **2.1. *Participants***

Patients with knee OA scheduled for primary unilateral total knee arthroplasty (TKA) or unicompartmental knee arthroplasty (UKA) were eligible for this study. The inclusion criteria were age  $\geq 65$  years and diagnosis of bilateral knee OA based on the clinical guidelines: knee pain for  $>3$  months and Kellgren–Lawrence score (KL-score) of  $\geq 2$  (Altman et al., 1986). Conversely, the exclusion criteria were: rheumatoid arthritis, knee OA after trauma, dementia (mini-mental state examination score  $<23$ ), need for human assistance in BADL (Barthel index  $<100$ ), intention to get TKA or UKA on the other knee, serious pathologies (e.g., cancer during treatment) and neurological findings (e.g., muscle weakness) that could influence the test performance. A total of 357 patients were identified at the start of the study. Of them, 166 patients were excluded due to a



history of TKA or UKA on the other knee (n=106), history of lower extremity surgery except knee joint (n=32), rheumatoid arthritis (n=13), mini-mental state examination score <23 (n=3), knee OA after trauma (n=3), Barthel index <100 (n=9). A total of 191 patients were invited to participate in this study, of whom, 12 refused. A total of 179 patients were finally included in the study.

## ***2.2. Study design***

This study used a cross-sectional design, and its conducting and reporting were guided by the STROBE guidelines (von et al., 2008). Sample recruitment was conducted at Shonan Kamakura General Hospital from May 17, 2019 to May 30, 2021. All participants provided informed consent before the study began. The study was conducted in accordance with the Declaration of Helsinki and was approved by the research ethics boards of the Tokushukai Group Ethics Committee (No. TGE01198-024). All measurements were evaluated by physical therapists one month before the surgery. Age, sex, body mass index, Charlson comorbidity index (Charlson et al.,

1987), and KL-score of both knees were obtained from clinical records and used as confounders.

## ***2.3 Outcome measures***

### ***2.3.1. IADL status***

IADL status was assessed on the basis of eight activity items (preparing food, shopping, housekeeping, doing laundry, taking medication, using transportation, using a telephone, and handling finances) using the IADL scale proposed by Lawton and Brody (1969). Participants were asked to answer their abilities to perform these IADL activities by “able,” “need help,” or “unable.” Based on previous cross-sectional reports (Hermesen et al., 2014; Lee et al., 2018), we defined those participants who opted for “need help” or “unable” to perform for at least one item as “disabled”; otherwise, they were defined as “non-disabled.”

### ***2.3.2. Psychological factors***

Pain catastrophizing, self-efficacy, and depressive symptoms were assessed as psychological factors based on previous reports that discussed the relationship between disability and psychological factors in patients with knee OA (Creamer et al., 2000; Maly et al., 2006; Odole et al., 2019; Rejeski et al., 2001; Sinikallio et al., 2014; Somers et al., 2009; Zambon et al., 2016).

Pain catastrophizing was assessed using Japanese version of six-item short form of the pain catastrophizing scale (PCS-6) (Nishigami et al., 2017). Pain catastrophizing scale consists of subscales related to magnification, rumination, and helplessness (Sullivan et al., 1995). PCS-6 has the same property as the original version, correlates to pain intensity assessed by numerical rating scales ( $r=0.30$ ,  $p<0.001$ ) (McWilliams et al., 2015), and has good internal consistency (Cronbach's  $\alpha=0.90$ ) (Nishigami et al., 2017). Participants were questioned on the degree to which they experienced each of the six thoughts and feelings when experiencing pain, on a scale from 0 ("not at all") to 4 ("all the time"). The total PCS-6 score ranges from 0 to 24, with higher scores indicating higher levels of pain catastrophizing.

Self-efficacy was assessed using Japanese version of four-item short form of the pain self-efficacy questionnaire (PSEQ-4) (Adachi et al., 2019). The pain self-efficacy questionnaire is a 10-item self-report questionnaire used to assess self-efficacy in individuals with chronic pain (Nicholas, 2007). PSEQ-4 has the same property as the original version (McWilliams et al., 2015), correlates pain intensity assessed by numerical rating scales ( $r=-0.35$ ,  $p<0.001$ ), and has good internal consistency (Cronbach's  $\alpha=0.90$ ) (Adachi et al., 2019). PSEQ-4 consists of four questions, and participants were questioned on how confident they were to perform the given activities despite pain, on a scale of 0 ("not at all confident") to 6 ("completely confident"). The PSEQ-4 scores range from 0 to 24, with higher scores indicating more confidence in performing the given activities despite pain.

Depressive symptoms were assessed using Japanese version of the fifteen-item geriatric depression scale (GDS-15) (Sugishita et al., 2017). GDS-15 can screen depression (area under the curve of the receiver characteristic operating curve=0.96) and has good internal consistency (Cronbach's  $\alpha=0.83$ ) (Sugishita et al., 2017). The

participants answered with a “yes” or “no” response. The total score was calculated from 0 to 15, with higher scores indicating more depressive symptoms.

## ***2.4. Confounders***

In addition to the aforementioned items, we assessed gait speed and pain intensity as confounders for outcome measures, referring to previous studies that report factors related to IADL disability in older adults (Hermesen et al., 2014; Lee et al. 2018; Nanjo et al., 2021; Zhang et al., 2019). Knee joint functions were also assessed as confounders, since they are considered specific factors related to disability in patients with knee OA (Kauppila et al, 2009). Based on previous studies regarding IADL disability and gait speed (Lee et al., 2018; Nanjo et al., 2021; Zhang et al., 2019), usual gait speed (UGS) was measured using a 5-meter gait test (Shinkai et al., 2000).

The Japanese version of pain subscale of the knee injury and osteoarthritis outcome score (KOOS-pain) was used for the representative index of pain intensity (Nakamura et al., 2011). KOOS-pain consists of nine questions. Participants were questioned about their condition one week before the evaluation date. Standardized

answer choices were provided, and each question was assigned a score ranging from 0 to 4. A normalized total score of 0 to 100 was calculated, and higher scores indicated that patients reported less pain. KOOS-pain correlates with the body pain subscale of the short form-36 health survey ( $r=0.67$ ,  $p<0.01$ ) and has good internal consistency (Cronbach's  $\alpha=0.90$ ) (Nakamura et al., 2011).

To test knee joint functions, isometric knee extension strength (IKES) was measured using a handheld dynamometer (Katoh & Yamasaki, 2009). Knee extension and flexion range of motion (ROM) were measured using a goniometer (Norkin & White, 1995). The knee scheduled for surgery was defined as the affected side, and the opposite side was defined as the unaffected side. IKES and knee ROM measurements were conducted on both knees.

## ***2.5. Statistical analysis***

The participants were divided into two groups according to their IADL status: those who answered “need help” or “unable” to perform on at least one item were assigned to the IADL disabled group, and those who answered “able” in all items were assigned to

the IADL non-disabled group. All outcome measures and confounders were compared between the two groups. The chi-square test was used for categorical variables, and student's *t*-test and Mann–Whitney *U* test were used for normally distributed and non-normally distributed variables, respectively. In the IADL disabled group, the proportion of each item of IADL disability was shown.

To confirm the relationships between confounders and psychological factors, correlations between continuous variables (*p*-values <0.05), while comparing the two groups, were calculated using Pearson's correlation coefficient and Spearman's rank correlation. Correlations among psychological factors were also calculated using Spearman's rank correlation. Regarding sex differences, the values of psychological factors between men and women were compared.

Which psychological factor can be associated with IADL disability was determined using a binary logistic regression model with IADL status as the dependent variable (disabled= 1 or not= 0). All Psychological factors (e.g., PCS-6, PSEQ-4, GDS-15) were included as the independent variable, because we consider all psychological variables to confound with each other based on the analysis results of the correlations.

Furthermore, since previous reports have shown that age, sex (Alexandre et al., 2014), gait speed (Lee et al., 2018; Nanjo et al., 2021; Zhang et al., 2019), and pain intensity (Hermesen et al., 2014; Nanjo et al., 2021) are factors related to IADL disability in older adults, these variables were included as confounders. In addition to this, other confounders that had  $p$ -values  $<0.05$  in the two groups of comparison were added to the logistic regression model as confounders. All analyses were performed using R version 4.0.3. for all tests, a  $p$ -value  $<0.05$  was considered statistically significant.

To create a sample size in a logistic regression analysis, the number of cases  $(N) = 10 k/p$  are needed, where  $k$  is the number of independent variables as covariates and  $p$  is a defined ratio of responders to non-responders at the follow-up points (Peduzzi et al., 1996). To avoid overfitting and to comply with the recommendations of Vittinghoff and McCulloch (2007), we assumed that we would arrive at nine factors out of all the variables in the measurements and demographics. In a previous study involving older adults with joint pain ( $n=407$ ), 60.9% of participants had IADL disability (Hermesen et al., 2014). Assuming that the ratio  $p$  of disabled to non-disabled is 1:1.5, the minimum sample size in this study was calculated as  $10 \times 9/0.6 = 150$ .



### 3. Results

All participants completed all assessments, and all confounders were collected from their medical records. Of all participants, 88 (49.1%) had IADL disabilities. Sixty-one (69.3%) showed disability in shopping, and 47 (53.4%) showed disability in using transportation. No participant showed disability in taking medication and using a telephone (Table 1).

The IADL non-disabled group was significantly younger ( $p=0.001$ ) and had a greater number of men ( $p=0.009$ ) than the IADL disabled group. The IADL non-disabled group showed significantly higher values of UGS and IKES on both sides, KOOS-pain and PSEQ-4. Conversely, the IADL non-disabled group showed significantly lower values of PCS-6 and GDS-15 (Table 2).

The results of the Pearson's correlation coefficient and Spearman's rank correlation coefficients are presented in Table 3. PCS-6 significantly correlated with PSEQ-4 ( $r=-0.23$ ) and GDS-15 ( $r=0.36$ ). PSEQ-4 significantly correlated with GDS-15

( $r=-0.42$ ). The combinations of other variables either significantly correlated weakly or did not significantly correlate, with the exception of PCS-6 and KOOS-pain ( $r=-0.48$ ).

In the comparison of psychological factors between men and women, women showed significantly higher values of PCS-6 (15.0 [11.0–19.0] (median [interquartile range] vs. 13.5 [8.5–16.0];  $p=0.03$ ). The values of PSEQ-4 (13.0 [12.0–17.0] vs. 14.5 [11.3–19.5];  $p=0.24$ ) and GDS-15 (3.5 [2.0–5.0] vs. 3.0 [1.0–6.0];  $p=0.73$ ) were not significantly different.

In the binary logistic regression analysis with IADL disability status as a dependent variable, IKES on the unaffected side was adopted as a confounder. IKES on both sides showed significant differences between the two groups, but the effect size of IKES on the unaffected side was greater than that on the affected side. Therefore, only IKES on the unaffected side was included to avoid multicollinearity. PSEQ-4 (odds ratio [OR] =0.90, 95% confidence interval [CI] =0.82–0.99,  $p=0.02$ ), UGS (OR=0.13, 95%CI=0.02–0.72,  $p=0.02$ ) and sex (OR=0.38, 95%CI=0.15–0.96,  $p=0.04$ ) were significantly independent variables (Table 4).

## 4. Discussion

The present study aimed to investigate which psychological factors are associated with IADL disability in older adults with knee OA. The values of PCS-6, PSEQ-4, and GDS-15 were significantly different between the IADL non-disabled and IADL disabled groups. However, in the logistic regression analysis, which contained all psychological factors and confounders, PSEQ-4 was the significant psychological factor associated with IADL disability.

In the logistic regression model, sex and UGS were also significantly independent variables. Alexandre et al. (2014) have shown that sex is a factor associated with IADL disability in older adults. Our results supported this finding. In particular, a reduction in gait speed has been reported as a strong factor associated with IADL disability in older adults (Donoghue et al., 2014; Lee et al., 2018; Zhang et al., 2019). The result in this study is consistent with our previous study that showed gait speed to be a discriminatory factor for IADL disability in older adults with knee OA (Nanjo et al., 2021). In this study, 49.1% of all participants had IADL disability. This proportion

was lower than that in a previous study involving older adults with joint pain (Hermesen et al., 2014). In our study population, main items pertaining to IADL disability were outdoor activities such as shopping (68.6%) and using transportation (50.6%) that required gait speed. Furthermore, because the effect size of UGS was the highest of all measurements when compared between the two groups, it could be a crucial factor associated with IADL disability in older adults with knee OA.

Regarding psychological factors and disability in patients with chronic pain, the fear-avoidance model proposes that pain catastrophizing and depressive symptoms are some of the leading causes of disability (Vlaeyen & Linton., 2000). Meanwhile, it has been suggested that self-efficacy is a mediator between pain intensity and disability (Arnstein, 2000). Our comparison of the two groups indicated that pain catastrophizing and depressive symptoms could be factors associated with IADL disability. However, based on the results of our multivariate analysis, self-efficacy assessed by PSEQ-4 is the most important factor associated with IADL disability in older adults with knee OA. A previous report involving patients with low back pain reported that the minimal importance change of PSEQ-4 was 1.5 points (Chiarotto et al., 2016). In our study

results, as the median difference in PSEQ-4 between the two groups was 2.0 points, it can be said that the two groups have clinically significant differences. In addition, the correlation between PSEQ-4 and UGS was weak, and PSEQ-4 was not significantly different for men and women. Therefore, these findings indicate that PSEQ-4 is hardly affected by demographics and motor functions and that it has a specific relationship with IADL disability in older adults with knee OA.

With respect to the relationship between pain self-efficacy and disability in patients with knee OA, Sinikallio et al. (2014) has suggested self-efficacy assessed using pain self-efficacy questionnaire was the only psychological factor associated with disability in multiple regression analysis that included demographics as confounders. Some cross-sectional studies have shown that self-efficacy, which partially includes pain elements, is a factor related to disability in patients with knee OA (Creamer et al., 2000; Maly et al., 2006). A cohort study in older adults with knee pain has reported that self-efficacy is a predictor of self-reported disability (Rejeski et al., 2001). Two cross-sectional studies in patients with chronic low back pain have also shown that self-efficacy related to pain is a factor related to disability (Ayre & Tyson, 2001; Costa et

al., 2011). With respect to the relationship between IADL disability and self-efficacy, using a logistic regression analysis that included demographics and pain intensity as confounders, a previous cross-sectional study on older adults with chronic joint pain has shown that self-efficacy is associated with IADL disability (Hermesen et al., 2014). The results of the above studies are consistent with those of our study. Self-efficacy describes the confidence that a person has in one's ability to achieve a desired outcome (Bandura, 1997). In patients with knee OA, those with high self-efficacy for controlling arthritis pain have higher pain thresholds than those with low self-efficacy (Keefe et al., 1997). Therefore, older adults with knee OA who have high self-efficacy might have the tendency to not voluntarily inhibit activities included in IADL even if they have knee pain. Consequently, we considered that PSEQ-4 was associated with IADL disability, even after adjusting for other confounders.

This study had several limitations. First, since this was a cross-sectional study, it was difficult to determine causal relationships between psychological factors and IADL disability incidence. Second, because this study included patients with knee OA scheduled for TKA or UKA, treatment situations were different from general older

adults with knee OA. Therefore, it might have been difficult to adapt the results to older adults with early-stage knee OA or low pain status. In particular, awaiting surgery could affect pain intensity and psychological factors related to pain. Nonetheless, the average KOOS-pain score in this study population was not inferior to those in other studies (Collins et al., 2016). The median PCS-6 and PSEQ-4 scores were also not inferior to those in previous studies in patients with chronic pain (McWilliams et al., 2015; Adachi et al., 2019). Third, because IADL disability was treated with categorical variables as the dependent variable in our logistic regression analyses, we could not identify the impact of each factor on IADL disability. However, when comparing the two groups, the effect sizes of the variables that were significantly related to IADL disability in logistic regression models were roughly the same. Certainly, we did not intend to predict self-reported IADL disability by using other assessments. We believe that knowledge regarding psychological factors in older adults with knee OA aids in understanding the risk of IADL disability or deterioration.

## 5. Conclusion

Regarding psychological factors, assessing self-efficacy using the PSEQ-4 was found to be associated with IADL disability even after adjusting for confounders. Sex and gait speed were also factors associated with IADL disability in older adults with knee OA. Our study demonstrated the importance of assessing self-efficacy using the PSEQ-4 as the factors associated with the presence of IADL disability in older adults with knee OA. Future studies are necessary to elucidate the mechanism by which self-efficacy is related to IADL disability in older adults with knee OA. Furthermore, longitudinal studies are needed to identify predictors of the development of IADL disability in older adults with knee OA.

### **CRedit authorship contribution statement**

**Keigo Nanjo:** Conceptualization, Methodology, Investigation, Formal analysis, Writing – original draft, Project administration. **Takashi Ikeda:** Methodology, Writing – original draft. **Naoko Nagashio:** Investigation, Writing - Review & Editing. **Tomoko**



**Sakai:** Methodology, Writing - Review & Editing. **Tetsuya Jinno:** Methodology,

Writing - Review & Editing, Supervision.

## **Acknowledgements**

The authors thank D. Kurihara, K. Imahira and K. Suda for their cooperation with data collection.

## **Funding sources**

This research did not receive any specific grant from funding agencies in the public, commercial, or not-for-profit sectors.

## **Declaration of Competing Interest**

None.

## References

- Adachi, T., Enomoto, K., Yamada, K., Inoue, D., Nakanishi, M., Takahashi, N., Nishigami, T., & Shibata, M. (2019). Evaluating the psychometric properties of two-item and four-item short forms of the Japanese Pain Self-Efficacy Questionnaire: a cross-sectional study. *Journal of Anesthesia*, 33(1), 58–66. <https://doi.org/10.1007/s00540-018-2583-8>
- Alexandre, Tda S., Corona, L. P., Nunes, D. P., Santos, J. L., Duarte, Y. A., & Lebrão, M. L. (2014). Disability in instrumental activities of daily living among older adults: gender differences. *Revista de Saúde Pública*, 48(3), 379–389. <https://doi.org/10.1590/s0034-8910.2014048004754>
- Altman, R., Asch, E., Bloch, D., Bole, G., Borenstein, D., Brandt, K., Christy, W., Cooke, T. D., Greenwald, R., & Hochberg, M. (1986). Development of criteria for the classification and reporting of osteoarthritis. Classification of osteoarthritis of the knee. Diagnostic

and Therapeutic Criteria Committee of the American Rheumatism

Association. *Arthritis and Rheumatism*, 29(8), 1039–1049.

<https://doi.org/10.1002/art.1780290816>

Arnstein, P. (2000). The mediation of disability by self efficacy in different

samples of chronic pain patients. *Disability and*

*Rehabilitation*, 22(17), 794–

801. <https://doi.org/10.1080/09638280050200296>

Ayre, M., & Tyson, G. A. (2001). The role of self-efficacy and fear-avoidance

beliefs in the prediction of disability. *Australian Psychologist*, 36(3),

250–253. <https://doi.org/10.1080/00050060108259663>

Bandura, A. (1977). Self-efficacy: toward a unifying theory of behavioral

change. *Psychological Review*, 84(2), 191–

215. <https://doi.org/10.1037/0033-295x.84.2.191>

Barberger-Gateau, P., Rainville, C., Letenneur, L., & Dartigues, J. F. (2000).

A hierarchical model of domains of disablement in the elderly: a

longitudinal approach. *Disability and Rehabilitation*, 22(7), 308–

317. <https://doi.org/10.1080/096382800296665>

Bennell, K. L., Ahamed, Y., Jull, G., Bryant, C., Hunt, M. A., Forbes, A. B.,

& Keefe, F. J. (2016). Physical therapist-delivered pain coping skills

training and exercise for knee osteoarthritis: randomized controlled

trial. *Arthritis Care and Research*, 68(5), 590–

602. <https://doi.org/10.1002/acr.22744>

Bijlsma, J. W., Berenbaum, F., & Lefeber, F. P. (2011). Osteoarthritis: an

update with relevance for clinical practice. *The Lancet*, 377(9783),

2115–2126. [https://doi.org/10.1016/S0140-6736\(11\)60243-2](https://doi.org/10.1016/S0140-6736(11)60243-2)

Charlson, M. E., Pompei, P., Ales, K. L., & MacKenzie, C. R. (1987). A new

method of classifying prognostic comorbidity in longitudinal studies:

development and validation. *Journal of Chronic Diseases*, 40(5), 373–

383. [https://doi.org/10.1016/0021-9681\(87\)90171-8](https://doi.org/10.1016/0021-9681(87)90171-8)

Chiarotto, A., Vanti, C., Cedraschi, C., Ferrari, S., de Lima E Sà Resende, F.,

Ostelo, R. W., & Pillastrini, P. (2016) Responsiveness and minimal important change of the pain self-efficacy questionnaire and short forms in patients with chronic low back pain. *Journal of Pain*, 17(6), 707–718. <https://doi.org/10.1016/j.jpain.2016.02.012>

Collins, N. J., Prinsen, C. A., Christensen, R., Bartels, E. M., Terwee, C. B.,

& Roos, E. M. (2016). Knee injury and osteoarthritis outcome score (KOOS): systematic review and meta-analysis of measurement properties. *Osteoarthritis and Cartilage*, 24(8), 1317–1329. <https://doi.org/10.1016/j.joca.2016.03.010>

Costa, Lda C., Maher, C. G., McAuley, J. H., Hancock, M. J., & Smeets, R. J.

(2011). Self-efficacy is more important than fear of movement in mediating the relationship between pain and disability in chronic low back pain. *European Journal of Pain*, 15(2), 213–219. <https://doi.org/10.1016/j.ejpain.2010.06.014>

Creamer, P., Lethbridge-Cejku, M., & Hochberg, M. C. (2000). Factors

associated with functional impairment in symptomatic knee

osteoarthritis. *Rheumatology*, 39(5), 490–

496. <https://doi.org/10.1093/rheumatology/39.5.490>

Dixon, K. E., Keefe, F. J., Scipio, C. D., Perri, L. M., & Abernethy, A. P.

(2007). Psychological interventions for arthritis pain management in

adults: a meta-analysis. *Health Psychology*, 26(3), 241–

250. <https://doi.org/10.1037/0278-6133.26.3.241>

Donoghue, O. A., Savva, G. M., Cronin, H., Kenny, R. A., & Horgan, N. F.

(2014). Using timed up and go and usual gait speed to predict incident

disability in daily activities among community-dwelling adults aged

65 and older. *Archives of Physical Medicine and*

*Rehabilitation*, 95(10), 1954–

1961. <https://doi.org/10.1016/j.apmr.2014.06.008>

Dunlop, D. D., Semanik, P., Song, J., Manheim, L. M., Shih, V., & Chang, R.

W. (2005). Risk factors for functional decline in older adults with  
arthritis. *Arthritis and Rheumatism*, 52(4), 1274–

1282. <https://doi.org/10.1002/art.20968>

Edjolo, A., Proust-Lima, C., Delva, F., Dartigues, J. F., & Pérès, K. (2016).

Natural history of dependency in the elderly: A 24-year population-  
based study using a longitudinal item response theory model.

*American Journal of Epidemiology*, 183(4), 277–285.

<https://doi.org/10.1093/aje/kwv223>

Field, A. (2012). *Discovering statistics using IBM SPSS Statistics* (fourth  
edn.). Sage Publications Ltd.

Fried, L. P., Kronmal, R. A., Newman, A. B., Bild, D. E., Mittelmark, M. B.,

Polak, J. F., & Gardin, J. M. (1998). Risk factors for 5-year mortality  
in older adults: the Cardiovascular Health Study. *JAMA*, 279(8), 585–

592. <https://doi.org/10.1001/jama.279.8.585>

GBD 2015 Disease and Injury Incidence and Prevalence Collaborators.

Global, regional, and national incidence, prevalence, and years lived with disability for 310 diseases and injuries, 1990-2015: a systematic analysis for the Global Burden of Disease Study 2015. (2016). *The Lancet*, 388(10053), 1545–1602. [https://doi.org/10.1016/S0140-6736\(16\)31678-6](https://doi.org/10.1016/S0140-6736(16)31678-6)

George, L. K., Ruiz, D., & Sloan, F. A. (2008). The effects of total knee arthroplasty on physical functioning in the older population. *Arthritis and Rheumatism*, 58(10), 3166–3171. <https://doi.org/10.1002/art.23888>

Hermesen, L. A., Leone, S. S., Smalbrugge, M., Dekker, J., & van der Horst, H. E. (2014). Frequency, severity and determinants of functional limitations in older adults with joint pain and comorbidity: results of a cross-sectional study. *Archives of Gerontology and Geriatrics*, 59(1), 98–106. <https://doi.org/10.1016/j.archger.2014.02.006>



Katoh, M., & Yamasaki, H. (2009). Comparison of reliability of isometric leg muscle strength measurements made using a hand-held dynamometer with and without a restraining belt. *Journal of Physical Therapy Science*, 21(1), 37–42. <https://doi.org/10.1589/jpts.21.37>

Katz, S., Ford, A. B., Moskowitz, R. W., Jackson, B. A., & Jaffe, M. W. (1963). Studies of illness in the aged. The index of ADL: A standardized measure of biological and function. *JAMA*, 185, 914–919. <https://doi.org/10.1001/jama.1963.03060120024016>

Kauppila, A. M., Kyllonen, E., Mikkonen, P., Ohtonen, P., Laine, V., Siira, P., Niinimäki, J. P., & Arokoski, J. P. (2009). Disability in end-stage knee osteoarthritis. *Disability and Rehabilitation*, 31(5), 370–380. <https://doi.org/10.1080/09638280801976159>

Keefe, F. J., Lefebvre, J. C., Maixner, W., Salley, A. N., & Caldwell, D. S. (1997). Self-efficacy for arthritis pain: relationship to perception of

thermal laboratory pain stimuli. *Arthritis Care and Research*, 10(3), 177–184. <https://doi.org/10.1002/art.1790100305>

Lee, M. C., Hsu, C. C., Tsai, Y. F., Chen, C. Y., Lin, C. C., & Wang, C. Y.

(2018). Criterion-referenced values of grip strength and usual gait speed using instrumental activities of daily living disability as the criterion. *Journal of Geriatric Physical Therapy*, 41(1), 14–19. <https://doi.org/10.1519/JPT.0000000000000106>

Maly, M. R., Costigan, P. A., & Olney, S. J. (2006). Determinants of self-report outcome measures in people with knee osteoarthritis. *Archives of Physical Medicine and Rehabilitation*, 87(1), 96–104. <https://doi.org/10.1016/j.apmr.2005.08.110>

McWilliams, L. A., Kowal, J., & Wilson, K. G. (2015). Development and evaluation of short forms of the pain catastrophizing scale and the pain self-efficacy questionnaire. *European Journal of Pain*, 19(9), 1342–1349. <https://doi.org/10.1002/ejp.665>

Nakamura, N., Takeuchi, R., Sawaguchi, T., Ishikawa, H., Saito, T., &

Goldhahn, S. (2011). Cross-cultural adaptation and validation of the

Japanese knee injury and osteoarthritis outcome score

(KOOS). *Journal of Orthopaedic Science*, 16(5), 516–

523. <https://doi.org/10.1007/s00776-011-0112-9>

Nanjo, K., Ikeda, T., Nagashio, N., Masuda, T., Sakai, T., Okawa, A., &

Jinno, T. (2021). Gait speed and pain status as discriminatory factors

for instrumental activities of daily living disability in older adults with

knee osteoarthritis. *Geriatrics and Gerontology International*, 21(8),

683–688. <https://doi.org/10.1111/ggi.14229>

Nicholas, M. K. (2007). The pain self-efficacy questionnaire: taking pain into

account. *European Journal of Pain*, 11(2), 153–

163. <https://doi.org/10.1016/j.ejpain.2005.12.008>

Nishigami, T., Mibu, A., Tanaka, K., Yamashita, Y., Watanabe, A., &

Tanabe, A. (2017). Psychometric properties of the Japanese version of

short forms of the pain catastrophizing scale in participants with  
musculoskeletal pain: A cross-sectional study. *Journal of Orthopaedic  
Science*, 22(2), 351–356. <https://doi.org/10.1016/j.jos.2016.11.015>

Norkin, C. C., & White, D. J. (1995). *Measurement of joint motion: a guide to  
goniometry* (second edn.). F. A. Davis.

Odole, A., Ekediegwu, E., Ekechukwu, E. N. D., & Uchenwoke, C. (2019).  
Correlates and predictors of pain intensity and physical function  
among individuals with chronic knee osteoarthritis in  
Nigeria. *Musculoskeletal Science and Practice*, 39, 150–  
156. <https://doi.org/10.1016/j.msksp.2018.11.014>

Peduzzi, P., Concato, J., Kemper, E., Holford, T. R., & Feinstein, A. R.  
(1996). A simulation study of the number of events per variable in  
logistic regression analysis. *Journal of Clinical Epidemiology*, 49(12),  
1373–1379. [https://doi.org/10.1016/S0895-4356\(96\)00236-3](https://doi.org/10.1016/S0895-4356(96)00236-3)

Pereira, D., Peleteiro, B., Araújo, J., Branco, J., Santos, R. A., & Ramos, E.

(2011). The effect of osteoarthritis definition on prevalence and incidence estimates: a systematic review. *Osteoarthritis and Cartilage*, 19(11), 1270–1285. <https://doi.org/10.1016/j.joca.2011.08.009>

Rajan, K. B., Hebert, L. E., Scherr, P. A., Mendes de Leon, C. F., & Evans, D.

A. (2013). Disability in basic and instrumental activities of daily living is associated with faster rate of decline in cognitive function of older adults. *Journals of Gerontology. Series A, Biological Sciences and Medical Sciences*, 68(5), 624–630. <https://doi.org/10.1093/gerona/gls208>

Rejeski, W. J., Miller, M. E., Foy, C., Messier, S., & Rapp, S. (2001). Self-

efficacy and the progression of functional limitations and self-reported disability in older adults with knee pain. *Journals of Gerontology. Series B, Psychological Sciences and Social Sciences*, 56(5), S261–S265. <https://doi.org/10.1093/geronb/56.5.s261>

Scott, W. K., Macera, C. A., Cornman, C. B., & Sharpe, P. A. (1997).

Functional health status as a predictor of mortality in men and women  
over 65. *Journal of Clinical Epidemiology*, 50(3), 291–  
296. [https://doi.org/10.1016/s0895-4356\(96\)00365-4](https://doi.org/10.1016/s0895-4356(96)00365-4)

Shinkai, S., Watanabe, S., Kumagai, S., Fujiwara, Y., Amano, H., Yoshida,

H., Ishizaki, T., Yukawa, H., Suzuki, T., & Shibata, H. (2000).

Walking speed as a good predictor for the onset of functional  
dependence in a Japanese rural community population. *Age and  
Ageing*, 29(5), 441–446. <https://doi.org/10.1093/ageing/29.5.441>

Sinikallio, S. H., Helminen, E. E., Valjakka, A. L., Väisänen-Rouvali, R. H.,

& Arokoski, J. P. (2014). Multiple psychological factors are  
associated with poorer functioning in a sample of community-dwelling  
knee osteoarthritis patients. *Journal of Clinical Rheumatology:  
Practical Reports on Rheumatic and Musculoskeletal Diseases*, 20(5),  
261–267. <https://doi.org/10.1097/RHU.0000000000000123>

Somers, T. J., Keefe, F. J., Pells, J. J., Dixon, K. E., Waters, S. J., Riordan, P.

A., Blumenthal, J. A., McKee, D. C., LaCaille, L., Tucker, J. M.,

Schmitt, D., Caldwell, D. S., Kraus, V. B., Sims, E. L., Shelby, R. A.,

& Rice, J. R. (2009). Pain catastrophizing and pain-related fear in

osteoarthritis patients: relationships to pain and disability. *Journal of*

*Pain and Symptom Management*, 37(5), 863–

872. <https://doi.org/10.1016/j.jpainsymman.2008.05.009>

Sugishita, K., Sugishita, M., Hemmi, I., Asada, T., & Tanigawa, T. (2017). A

validity and reliability study of the Japanese version of the Geriatric

Depression Scale 15 (GDS-15-J). *Clinical Gerontologist*, 40(4), 233–

240. <https://doi.org/10.1080/07317115.2016.1199452>

Sullivan, M. J. L., Bishop, S. R., & Pivik, J. (1995). The pain catastrophizing

scale: development and validation. *Psychological Assessment*, 7(4),

524–532. <https://doi.org/10.1037/1040-3590.7.4.524>

van Dijk, G. M., Veenhof, C., Lankhorst, G. J., & Dekker, J. (2009).

Limitations in activities in patients with osteoarthritis of the hip or

knee: the relationship with body functions, comorbidity and cognitive

functioning. *Disability and Rehabilitation*, 31(20), 1685–

1691. <https://doi.org/10.1080/09638280902736809>

Vittinghoff, E., & McCulloch, C. E. (2007). Relaxing the rule of ten events

per variable in logistic and Cox regression. *American Journal of*

*Epidemiology*, 165(6), 710–718. <https://doi.org/10.1093/aje/kwk052>

Vlaeyen, J. W. S., & Linton, S. J. (2000). Fear-avoidance and its

consequences in chronic musculoskeletal pain: a state of the

art. *Pain*, 85(3), 317–332. <https://doi.org/10.1016/S0304->

3959(99)00242-0

von Elm, E., Altman, D. G., Egger, M., Pocock, S. J., Gøtzsche, P. C.,

Vandenbroucke, J. P., & Initiative, S. (2008). The strengthening the

reporting of observational studies in epidemiology (STROBE)



statement: guidelines for reporting observational studies. *J Clin*

*Epidemiol*, 61(4), 344-349.

<https://doi.org/10.1016/j.jclinepi.2007.11.008>

Zambon, S., Siviero, P., Denking, M., Limongi, F., Victoria Castell, M., van

der Pas, S., Otero, Á, Edwards, M. H., Peter, R., Pedersen, N. L.,

Sánchez-Martinez, M., Dennison, E. M., Gesmundo, A., Schaap, L.

A., Deeg, D. J., van Schoor, N. M., Maggi, S., & Eposa Research

Group. (2016). Role of osteoarthritis, comorbidity, and pain in

determining functional limitations in older populations: European

project on osteoarthritis. *Arthritis Care and Research*, 68(6), 801–

810. <https://doi.org/10.1002/acr.22755>

Zhang, L., Guo, L., Wu, H., Gong, X., Lv, J., & Yang, Y. (2019). Role of

physical performance measures for identifying functional disability

among chinese older adults: data from the china health and retirement

longitudinal study. *PLOS ONE*, 14(4),

e0215693. <https://doi.org/10.1371/journal.pone.0215693>

Table 1. Content of IADL disability in IADL disabled group (n=88)

| Item                 |           |
|----------------------|-----------|
| Preparing food       | 33 (37.5) |
| Shopping             | 61 (69.3) |
| Housekeeping         | 40 (45.5) |
| Doing laundry        | 6 (6.8)   |
| Taking medication    | 0 (0)     |
| Using transportation | 47 (53.4) |
| Using a telephone    | 0 (0)     |
| Handling finances    | 15 (17.0) |

Number (%) was shown.

IADL: Instrumental activity of daily living

Table 2. Baseline characteristics of the study population and comparison between IADL non-disabled and disabled groups

| Variable                                             | ALL (n= 179)     | IADL non-disabled (n=91) | IADL disabled (n=88) | <i>p</i> -value | effect size |
|------------------------------------------------------|------------------|--------------------------|----------------------|-----------------|-------------|
| Women; number (%)                                    | 141 (78.8)       | 64 (70.6)                | 77 (87.5)            | 0.009           | 0.2         |
| Age; mean±SD                                         | 76.5 ± 5.4       | 75.2 ± 5.2               | 77.8 ± 5.2           | 0.001           | 0.24        |
| Body mass Index(kg/m <sup>2</sup> );<br>median (IQR) | 23.1 (21.1–26.2) | 22.9 (21.4–26.1)         | 23.1 (21.4–26.1)     | 0.74            | 0.02        |
| Family status (living alone);<br>number (%)          | 36 (20.1)        | 22 (24.2)                | 14 (15.9)            | 0.23            | 0.09        |
| CCI; median (IQR)                                    | 0 (0–1.0)        | 0 (0–1.0)                | 0 (0–1.0)            | 0.63            | 0.04        |
| KL score on affected side                            |                  |                          |                      |                 |             |
| II; number (%)                                       | 19 (10.6)        | 9 (9.9)                  | 10 (11.4)            | 0.44            | 0.1         |
| III; number (%)                                      | 101 (56.4)       | 48 (52.7)                | 53 (60.2)            |                 |             |
| IV; number (%)                                       | 59 (33.0)        | 34 (37.4)                | 25 (28.4)            |                 |             |
| KL score on unaffected side                          |                  |                          |                      |                 |             |
| II; number (%)                                       | 62 (34.6)        | 33 (36.3)                | 29 (33.0)            | 0.5             | 0.09        |
| III; number (%)                                      | 82 (45.8)        | 38 (41.8)                | 44 (50.0)            |                 |             |
| IV; number (%)                                       | 35 (19.6)        | 20 (22.0)                | 15 (17.0)            |                 |             |
| Psychological factors                                |                  |                          |                      |                 |             |
| PCS-6; median (IQR)                                  | 15.0 (10.0-18.0) | 14.0 (7.5-17.0)          | 16.0 (12.0-19.0)     | 0.003           | 0.23        |
| GDS-15; median (IQR)                                 | 3.0 (1.5–6.0)    | 3.0 (1.0–6.0)            | 4.0 (2.0-7.3)        | <0.001          | 0.25        |

|                                       |                 |                  |                  |                  |        |      |
|---------------------------------------|-----------------|------------------|------------------|------------------|--------|------|
| PSEQ-4; median (IQR)                  |                 | 14.0 (12.0-17.0) | 15.0 (12.0-18.5) | 13.0 (11.0-15.0) | <0.001 | 0.29 |
| UGS (m/sec); mean±SD                  |                 | 0.93 ± 0.27      | 1.02 ± 0.27      | 0.83 ± 0.27      | <0.001 | 0.37 |
| KOOS-pain; mean±SD                    |                 | 45.6 ± 16.8      | 48.6 ± 17.8      | 42.5 ± 15.1      | 0.01   | 0.18 |
| IKES (Nm/kg) ; median (IQR)           | affected side   | 1.09 (0.81–1.43) | 1.23 (0.96–1.59) | 0.99 (0.73–1.31) | <0.001 | 0.27 |
|                                       | unaffected side | 1.10 (0.78–1.47) | 1.26 (0.96–1.61) | 0.94 (0.75–1.30) | <0.001 | 0.29 |
| Knee flexion ROM (°) ; median (IQR)   | affected side   | 130 (115–135)    | 130 (115–135)    | 130 (115–140)    | 0.86   | 0.03 |
|                                       | unaffected side | 125 (120–140)    | 125 (120–137.5)  | 130 (115–140)    | 0.63   | 0.03 |
| Knee extension ROM (°) ; median (IQR) | affected side   | -5 (-10 to 0)    | -5 (-10 to 0)    | -5 (-10 to 0)    | 0.51   | 0.05 |
|                                       | unaffected side | -5 (-10 to 0)    | -5 (-5 to 0)     | -5 (-10 to 0)    | 0.25   | 0.07 |

Effect size was estimated using  $r$  for continuous variables ( $r = \sqrt{t^2 / (t^2 + df)}$ , for normally distributed variables;  $r = z / \sqrt{N}$ , for non-normally distributed variables) and Cramér's  $V$  for categorical variables (Field, 2012).

CCI, Charlson comorbidity index; GDS-15, the fifteen-item geriatric depression scale; IADL, instrumental activities of daily living; IKES, isometric knee extension strength; IQR, interquartile range; KL-score, Kellgren-Lawrence score; KOOS-pain, pain subscale of the knee injury and osteoarthritis outcome score; PCS-6, six-item short form of the pain catastrophizing scale; PSEQ-4, four-item short form of the pain self-efficacy questionnaire; ROM, range of motion; UGS, usual gait speed

Table 3. Correlation between variables of psychological factors and confounders

| Variable                | PCS-6              | PSEQ-4             | GDS-15             |
|-------------------------|--------------------|--------------------|--------------------|
| Age                     | 0.07               | -0.04              | 0.12               |
| UGS                     | -0.26 <sup>†</sup> | 0.20 <sup>†</sup>  | -0.25 <sup>‡</sup> |
| IKES on affected side   | -0.17 <sup>*</sup> | 0.15               | -0.06              |
| IKES on unaffected side | -0.10              | 0.27 <sup>‡</sup>  | -0.11              |
| KOOS-pain               | -0.48 <sup>‡</sup> | 0.29 <sup>‡</sup>  | -0.19 <sup>†</sup> |
| PCS-6                   |                    | -0.23 <sup>†</sup> | 0.36 <sup>‡</sup>  |
| PSEQ-4                  |                    |                    | -0.42 <sup>‡</sup> |

\*:  $p < 0.05$ , †:  $p < 0.01$ , ‡:  $p < 0.001$  Pearson's correlation coefficient and Spearman's rank correlation coefficients are presented.

GDS-15, the fifteen-item geriatric depression scale; IKES, isometric knee extension strength; KOOS-pain, pain subscale of the knee injury and osteoarthritis outcome score; PCS-6, six-item short form of the pain catastrophizing scale; PSEQ-4, four-item short form of the pain self-efficacy questionnaire; UGS, usual gait speed

Table 4. logistic regression model with the dependent variable as IADL disable or not.

| Variables            | Crude OR | Adjusted OR | 95%CI     | <i>p</i> -value |
|----------------------|----------|-------------|-----------|-----------------|
| Age                  | 1.10     | 1.07        | 1.00–1.15 | 0.07            |
| Sex                  | 0.33     | 0.38        | 0.15–0.96 | 0.04            |
| UGS                  | 0.05     | 0.13        | 0.02–0.72 | 0.02            |
| IKES unaffected side | 0.35     | 0.73        | 0.32–1.64 | 0.45            |
| KOOS-pain            | 0.98     | 1.01        | 0.99–1.04 | 0.30            |
| PCS-6                | 1.07     | 1.06        | 0.94–1.19 | 0.13            |
| PSEQ-4               | 0.86     | 0.90        | 0.82–0.99 | 0.02            |
| GDS-15               | 1.17     | 1.06        | 0.94–1.19 | 0.45            |

Hosmer-Lemeshow test = 0.47, area under the curve (95% CI) = 0.80 (0.73–0.86)

CI, confidence interval; GDS-15, the fifteen-item geriatric depression scale; IADL, instrumental activity of daily living; IKES, isometric knee extension strength; OR, odds ratio; KOOS-pain, pain subscale of the knee injury and osteoarthritis outcome score; PCS-6, six-item short form of the pain catastrophizing scale; PSEQ-4, four-item short form of the pain self-efficacy questionnaire; UGS, usual gait speed
